# Supplementary material for: Impact of Dietary Modifications on Plasma Sirtuins 1, 3 and 5 in Older Overweight Individuals Undergoing 12-Weeks of Circuit Training
Source: MDPI journal article supplement (doi:10.3390/nu13113824), 2021-10-27
Supplement: s1 [file s1]

Supplementary

# Impact of Dietary Modifications on Plasma Sirtuins 1, 3 and 5 in Older Overweight Individuals Undergoing 12-Weeks of Circuit Training

Paulina Wasserfurth<sup>1,2</sup>, Josefine Nebl<sup>1</sup>, Miriam Rebekka Rühling<sup>3</sup>, Hadeel Shammash<sup>3</sup>, Jolanthe Bednarczyk<sup>3</sup>, Karsten Koehler<sup>2</sup>, Tim Konstantin Boßlau<sup>3</sup>, Karsten Krüger<sup>3</sup>, Andreas Hahn<sup>1</sup> and Anibh Das<sup>3\*</sup>

**Table S1:** Name and sequence of qRT-PCR-Primers.

| Primer                  | Sequence                   |
|-------------------------|----------------------------|
| human SUPT20H (forward) | CAC CAA CCC CTT CAT CGA CC |
| human SUPT20H (reverse) | CCT GGC TCA GAG ACC TTT GC |
| human SIRT1 (forward)   | CAA CTT GTA CGA CGA AGA C  |
| human SIRT1 (reverse)   | TCA TCA CCG AAC AGA AGG    |
| human SIRT3 (forward)   | CAG TCT GCC AAA GAC CCT    |
| human SIRT3 (reverse)   | AAA TCA ACC ACA TGC AGC AA |
| human SIRT5 (forward)   | AGT GGT GTT CCG ACC TTC AG |
| human SIRT5 (reverse)   | CAT CGA TGT TCT GGG TGA TG |

**Table S2.** Dietary intakes from 3-day food logs.

|                                   |      | CON          | EX          | EXDC        | EXCO         | <i>p</i> |
|-----------------------------------|------|--------------|-------------|-------------|--------------|----------|
| Energy<br>intake<br>(kcal/day)    | pre  | 1792 ± 322   | 2028 ± 483  | 1955 ± 527  | 1917 ± 541   | 0.501    |
|                                   | post | 1906 ± 293   | 1814 ± 378  | 1634 ± 528* | 1858 ± 417   | 0.548    |
|                                   | Δ    | 114 ± 435    | -214 ± 436  | -322 ± 422  | -59 ± 674    | 0.215    |
| Protein<br>(%E/day)               | pre  | 18 ± 2       | 16 ± 4      | 17 ± 4      | 16 ± 4       | 0.629    |
|                                   | post | 18 ± 2       | 17 ± 4      | 18 ± 4      | 16 ± 3       | 0.387    |
|                                   | Δ    | -0.11 ± 2    | 0.66 ± 4    | 2 ± 4       | -0.11 ± 5    | 0.722    |
| Fat<br>(%E/day)                   | pre  | 36 ± 6       | 37 ± 9      | 41 ± 7      | 39 ± 7       | 0.340    |
|                                   | post | 40 ± 7       | 38 ± 7      | 39 ± 9      | 36 ± 8       | 0.722    |
|                                   | Δ    | 4 ± 8        | 1 ± 8       | -2 ± 7      | -3 ± 8       | 0.283    |
| CHO<br>(%E/day)                   | pre  | 41 ± 6       | 42 ± 11     | 37 ± 5      | 40 ± 7       | 0.125    |
|                                   | post | 37 ± 7       | 40 ± 5      | 37 ± 7      | 41 ± 7       | 0.357    |
|                                   | Δ    | -4 ± 7       | -2 ± 9      | -0 ± 7      | 1 ± 4        | 0.191    |
| Fiber<br>(g/day)                  | pre  | 19 ± 8       | 24 ± 8      | 20 ± 9      | 23 ± 7       | 0.384    |
|                                   | post | 19 ± 11      | 19 ± 7*     | 22 ± 5      | 26 ± 13      | 0.227    |
|                                   | Δ    | 0 ± 7        | -5 ± 7      | 2 ± 9       | 3 ± 10       | 0.083    |
| EPA<br>(g/day)                    | pre  | 0.24 ± 0.65  | 0.11 ± 0.17 | 0.03 ± 0.02 | 0.28 ± 0.64  | 0.841    |
|                                   | post | 0.04 ± 0.03  | 0.16 ± 0.30 | 0.09 ± 0.07 | 0.07 ± 0.07  | 0.767    |
|                                   | Δ    | -0.20 ± 0.64 | 0.05 ± 0.36 | 0.06 ± 0.08 | -0.21 ± 0.66 | 0.241    |
| DHA<br>(g/day)                    | pre  | 0.25 ± 0.41  | 0.21 ± 0.21 | 0.18 ± 0.11 | 0.28 ± 0.31  | 0.829    |
|                                   | post | 0.12 ± 0.06  | 0.28 ± 0.46 | 0.21 ± 0.12 | 0.16 ± 0.17  | 0.538    |
|                                   | Δ    | -0.13 ± 0.38 | 0.07 ± 0.51 | 0.03 ± 0.23 | -0.12 ± 0.31 | 0.903    |
| Retinol<br>equivalent<br>(μg/day) | pre  | 1252 ± 846   | 1478 ± 731  | 1486 ± 736  | 1846 ± 2217  | 0.627    |
|                                   | post | 1315 ± 861   | 1299 ± 815  | 1617 ± 1064 | 1466 ± 566   | 0.672    |
|                                   | Δ    | 63 ± 968     | -179 ± 1059 | 132 ± 1495  | -380 ± 2227  | 0.892    |
| Vitamin C<br>(mg/day)             | pre  | 93 ± 60      | 165 ± 102   | 116 ± 59    | 109 ± 44     | 0.138    |
|                                   | post | 129 ± 115    | 106 ± 38*   | 153 ± 66    | 117 ± 77     | 0.277    |
|                                   | Δ    | 36 ± 81      | -59 ± 108   | 37 ± 75     | 8 ± 61       | 0.058    |
| α-Toco-<br>pherol<br>(mg/day)     | pre  | 7 ± 2        | 10 ± 4      | 11 ± 7      | 11 ± 5       | 0.105    |
|                                   | post | 9 ± 2**      | 10 ± 4      | 36 ± 74     | 11 ± 5       | 0.899    |
|                                   | Δ    | 2 ± 2        | -0 ± 6      | 25 ± 76     | 0. ± 6       | 0.618    |

Data are shown as mean ± SD. Differences among groups were assessed with Kruskal-Wallis-Test, differences within groups were detected with Wilcoxon test (\*  $p < 0.05$ ; \*\*  $p < 0.01$  ).

**Table S3:** Dietary intakes from food frequency questionnaires.

|                                                |      | CON          | EX         | EXDC        | EXCO       | <i>p</i>     |
|------------------------------------------------|------|--------------|------------|-------------|------------|--------------|
| Fruit intake<br>(portion/<br>day)              | pre  | 1.4 ± 1.1    | 1.7 ± 1.2  | 1.5 ± 1.2   | 1.8 ± 1.7  | 0.783        |
|                                                | post | 1.4 ± 0.7    | 1.9 ± 2.3  | 2.5 ± 1.3*  | 1.4 ± 0.8  | 0.151        |
|                                                | Δ    | 0.0 ± 1.2    | 0.2 ± 1.3  | 1.0 ± 1.1   | -0.4 ± 1.5 | 0.076        |
| Vegetable in-<br>take (portion/<br>day)        | pre  | 1.8 ± 3.2    | 1.2 ± 0.8  | 0.9 ± 0.3   | 0.9 ± 0.8  | 0.719        |
|                                                | post | 0.7 ± 0.6*   | 1.0 ± 0.7  | 1.4 ± 0.8   | 1.0 ± 0.8  | 0.284        |
|                                                | Δ    | -1.1 ± 2.7 # | -0.1 ± 0.5 | 0.6 ± 0.7 # | 0.1 ± 1.0  | <b>0.018</b> |
| Cereal intake<br>(portion/<br>day)             | pre  | 3.8 ± 2.4    | 3.0 ± 2.5  | 3.8 ± 2.9   | 3.4 ± 1.7  | 0.581        |
|                                                | post | 2.4 ± 0.8*   | 2.6 ± 1.4  | 2.9 ± 1.6   | 2.7 ± 1.4  | 0.983        |
|                                                | Δ    | -1.4 ± 1.8   | -0.5 ± 1.2 | -0.9 ± 3.1  | -0.6 ± 1.8 | 0.643        |
| Green & black<br>tea (cups/<br>day)            | pre  | 0.3 ± 0.5    | 1.5 ± 2.2  | 0.5 ± 0.8   | 2.2 ± 3.1  | 0.582        |
|                                                | post | 1.1 ± 1.5    | 0.9 ± 1.7  | 2.2 ± 3.0   | 0.6 ± 1.0  | 0.932        |
|                                                | Δ    | 0.7 ± 1.3    | -0.6 ± 2.5 | 1.6 ± 3.4   | -1.6 ± 3.3 | 0.232        |
| Coffee (cups/<br>day)                          | pre  | 4.7 ± 7.9    | 2.6 ± 4.6  | 3.7 ± 2.1   | 2.8 ± 2.1  | 0.152        |
|                                                | post | 1.4 ± 1.3    | 2.5 ± 1.7  | 2.8 ± 3.3   | 2.5 ± 1.3  | 0.490        |
|                                                | Δ    | -3.2 ± 8.3   | -0.1 ± 4.5 | -0.9 ± 4.2  | -0.4 ± 2.4 | 0.561        |
| Wine & spar-<br>kling wine<br>(glases/<br>day) | pre  | 0.3 ± 0.2    | 0.4 ± 0.6  | 0.2 ± 0.2   | 0.5 ± 0.4  | 0.406        |
|                                                | post | 0.2 ± 0.2    | 0.7 ± 1.1  | 0.2 ± 0.4   | 0.2 ± 0.2  | 0.192        |
|                                                | Δ    | -0.0 ± 0.2   | 0.3 ± 0.7  | 0.1 ± 0.4   | -0.2 ± 0.4 | 0.097        |

Data are shown as mean ± SD. Differences among groups were assessed with Kruskal-Wallis-Test, differences within groups were detected with Wilcoxon test (\*p < 0.05; \*\* p < 0.01; # p < 0.001)
